# Supplementary material for: MiR-2425-5p targets RAD9A and MYOG to regulate the proliferation and differentiation of bovine skeletal muscle-derived satellite cells
Source: PubMed Central journal article supplement (PMC5428422; doi:10.1038/s41598-017-00470-8), 2017-03-24

**Manuscript title: MiR-2425-5p targets RAD9A and MYOG to regulate the proliferation and differentiation of bovine skeletal muscle-derived satellite cells**

**Authors:** Hui Li Tong, Run Ying Jiang, Wei Wei Zhang, Yun Qin Yan

**ID:** SREP-16-28588A (B)

**Information note:** We used polyclonal antibodies in our experiment. So you can see several blots in some WB graphs. Sometimes you can also see only one blot in some WB graphs because we cropped the NC membranes in WB process with the needs of experiments.

**Figure 2E**

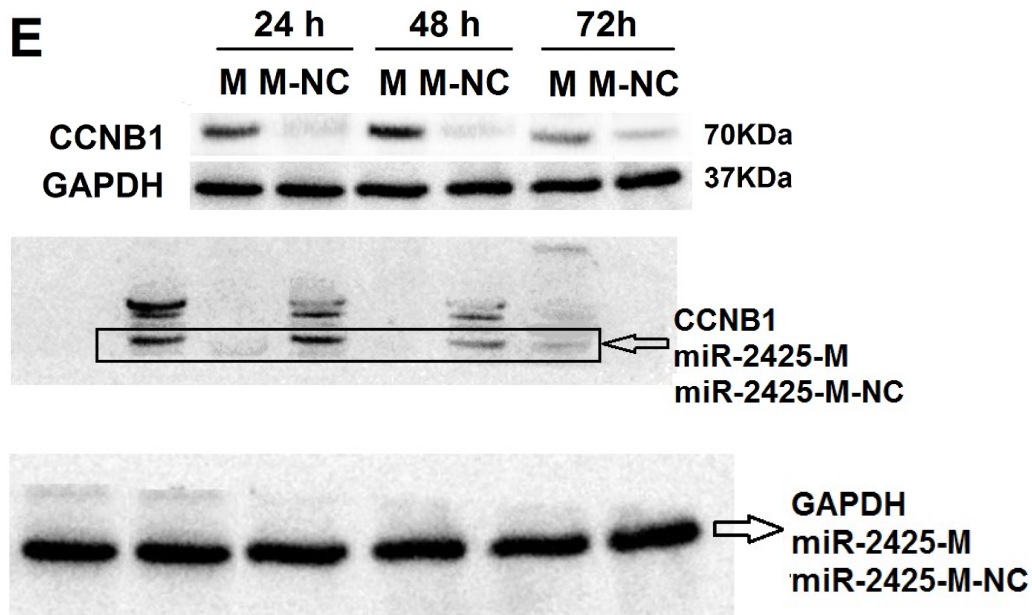

**Figure 2F**

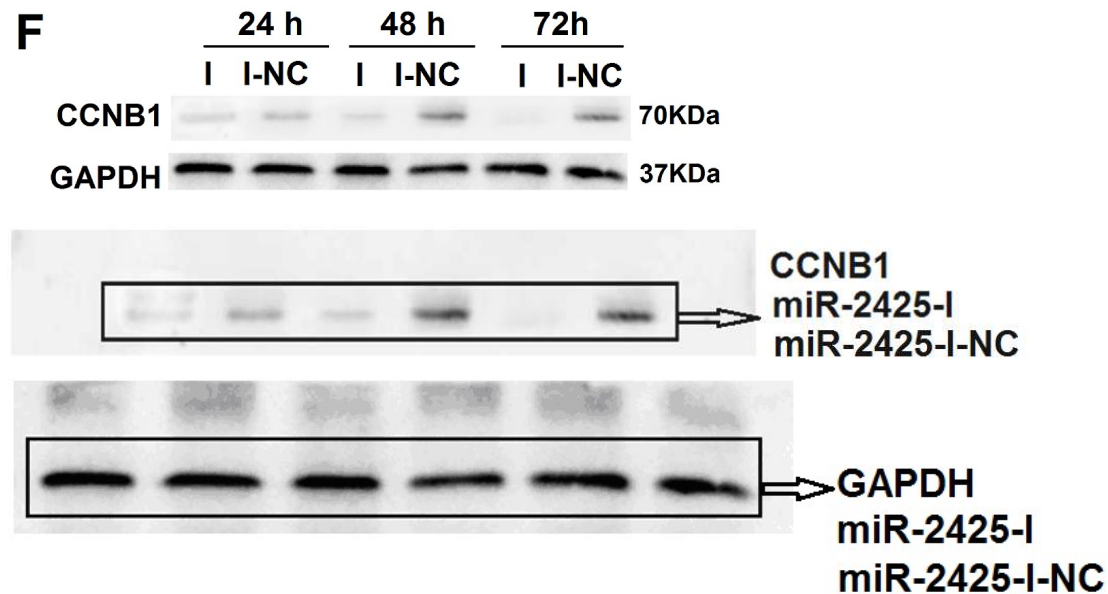

Figure 2G

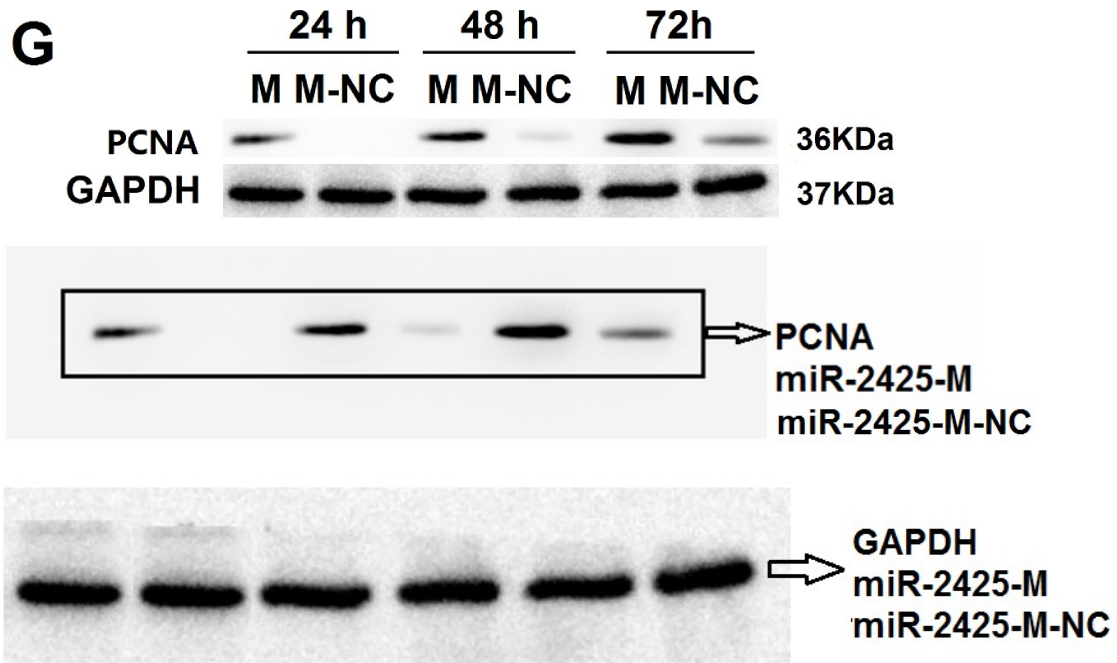

Figure 2H

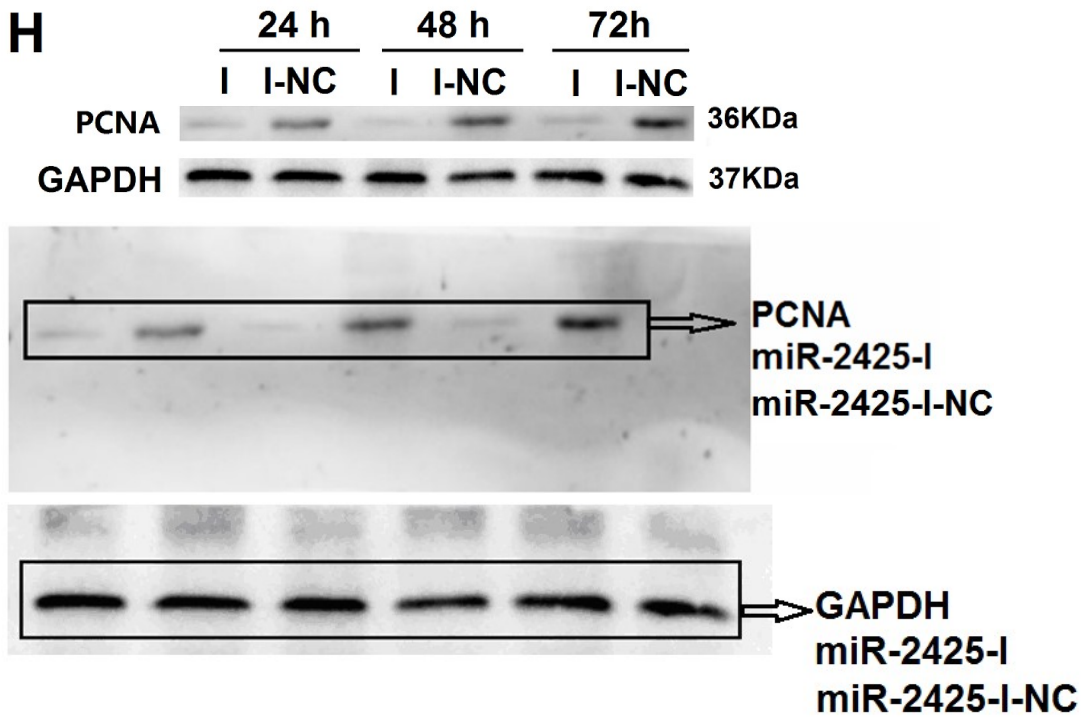

Figure 3C

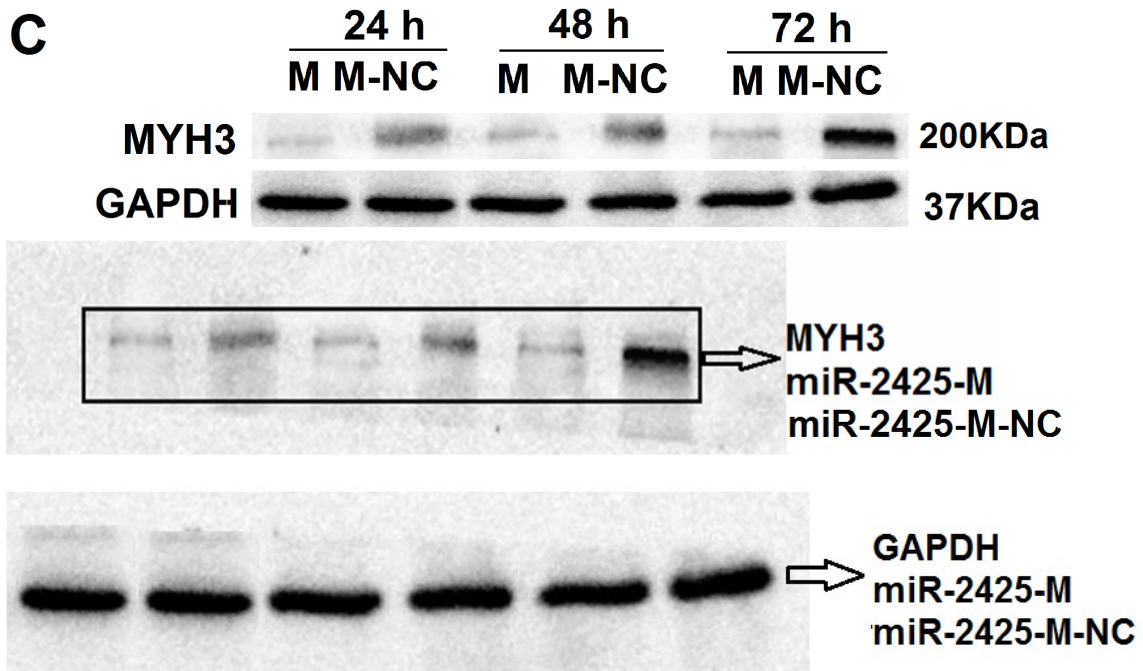

Figure 3D

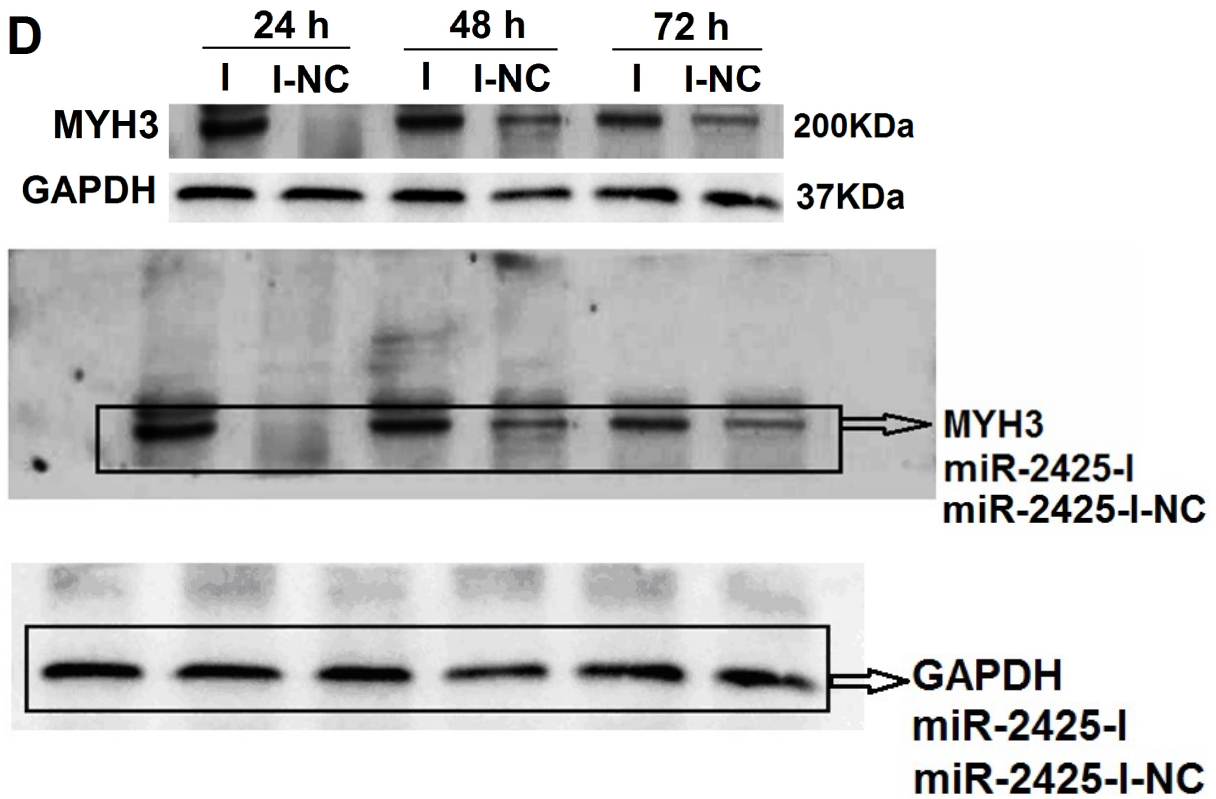

Figure 4C

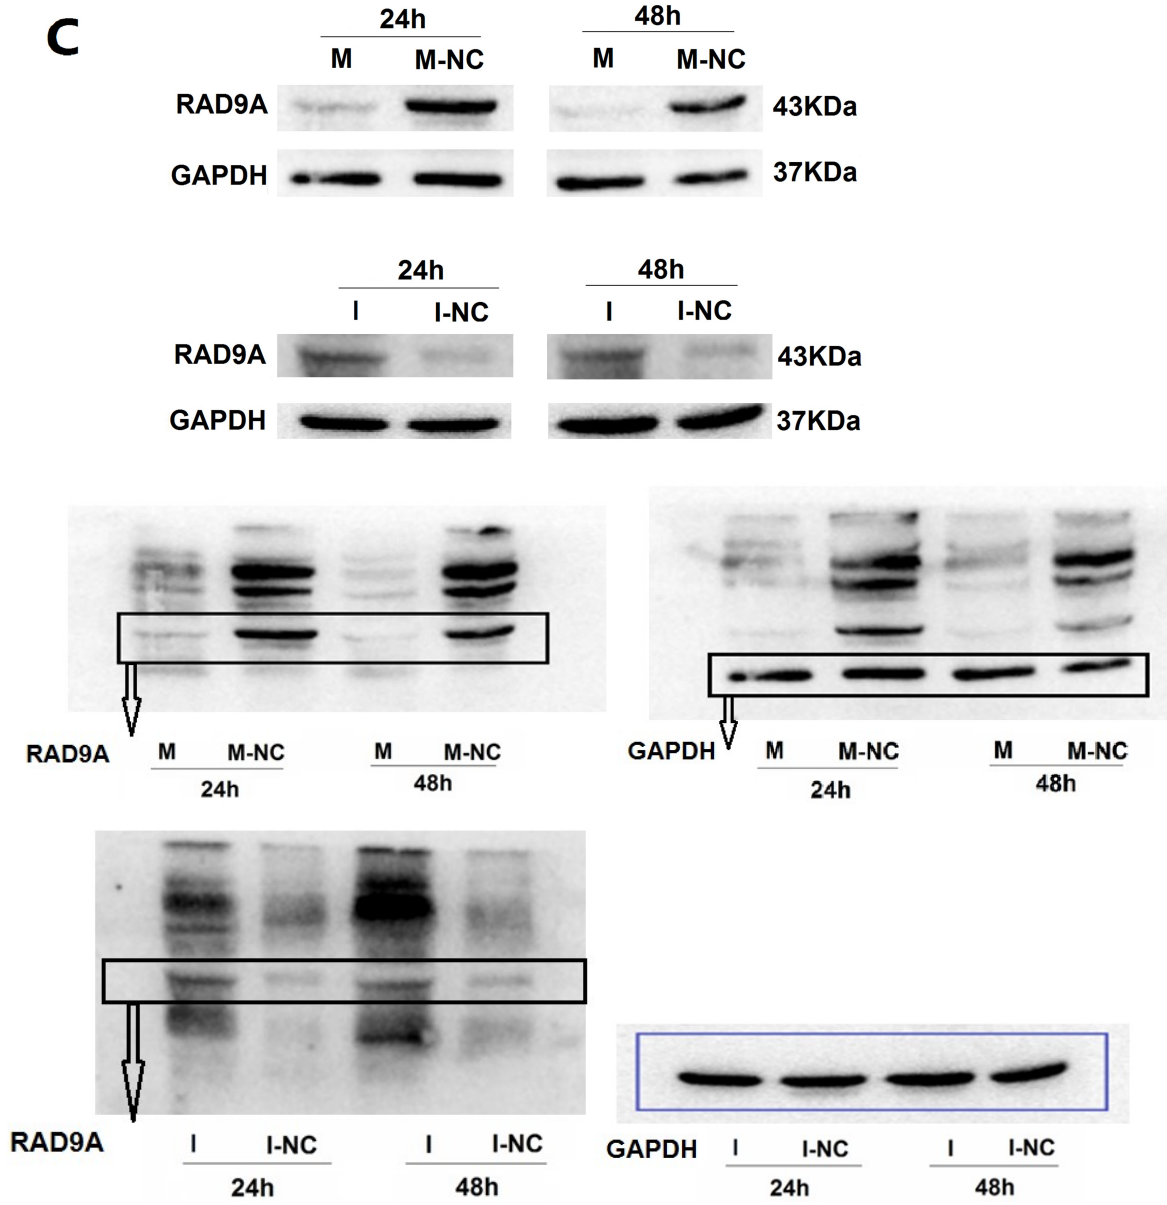

Figure 4E

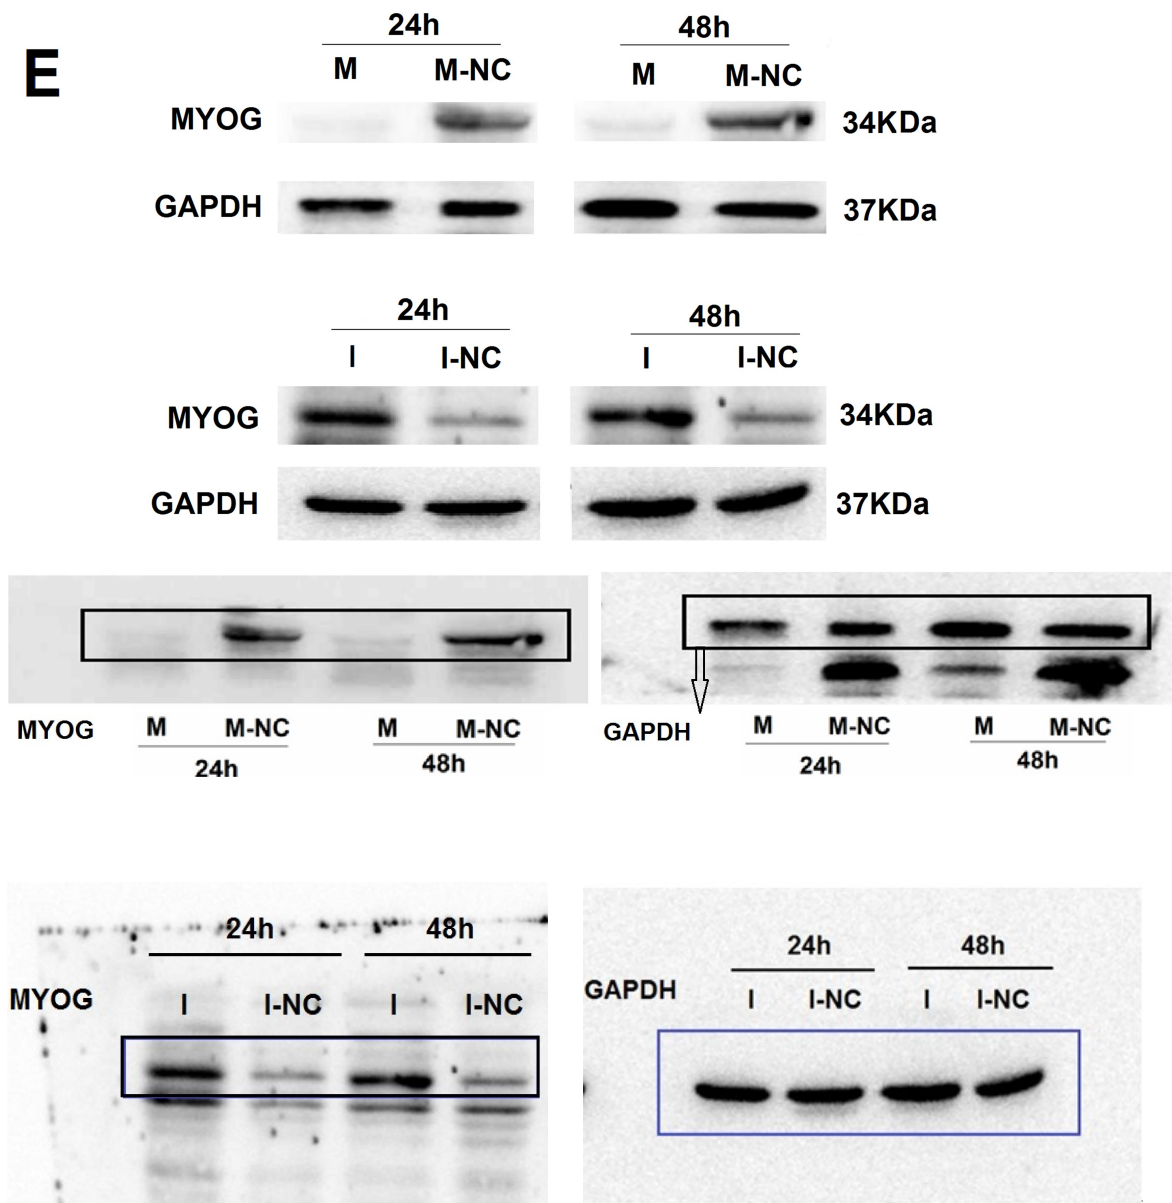

Figure 5C

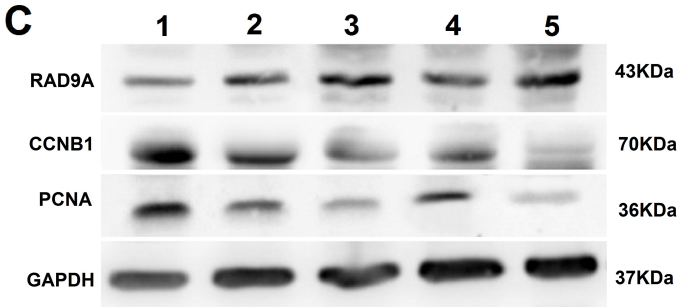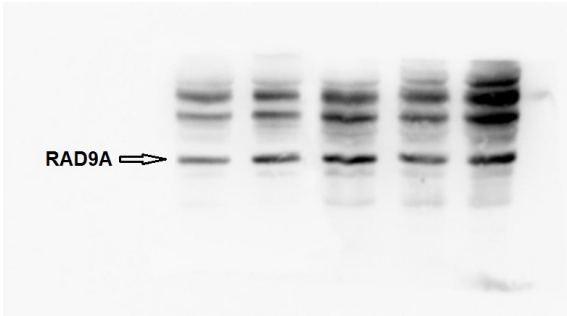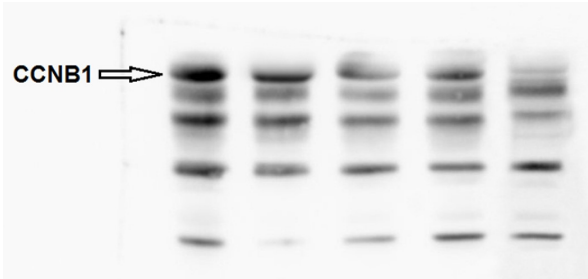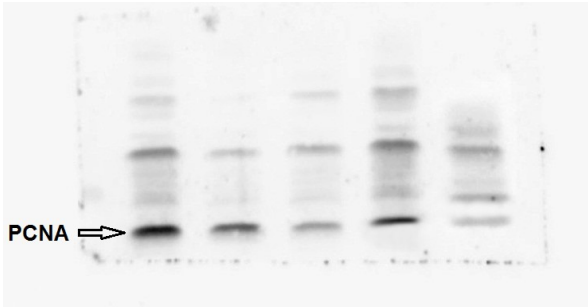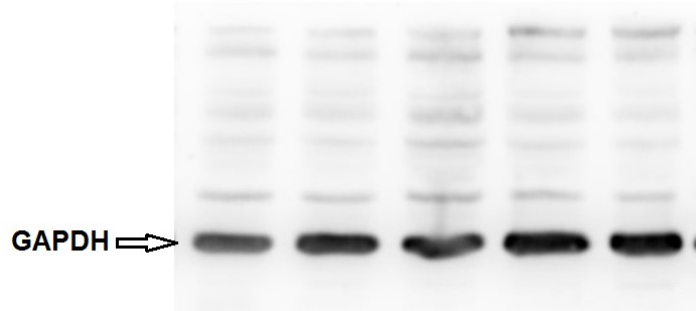

Supplement: 41598_2017_470_MOESM1_ESM.pdf [file 41598_2017_470_MOESM1_ESM.pdf]
